# Supplementary material
Source: PubMed Central journal article supplement (PMC2914126)

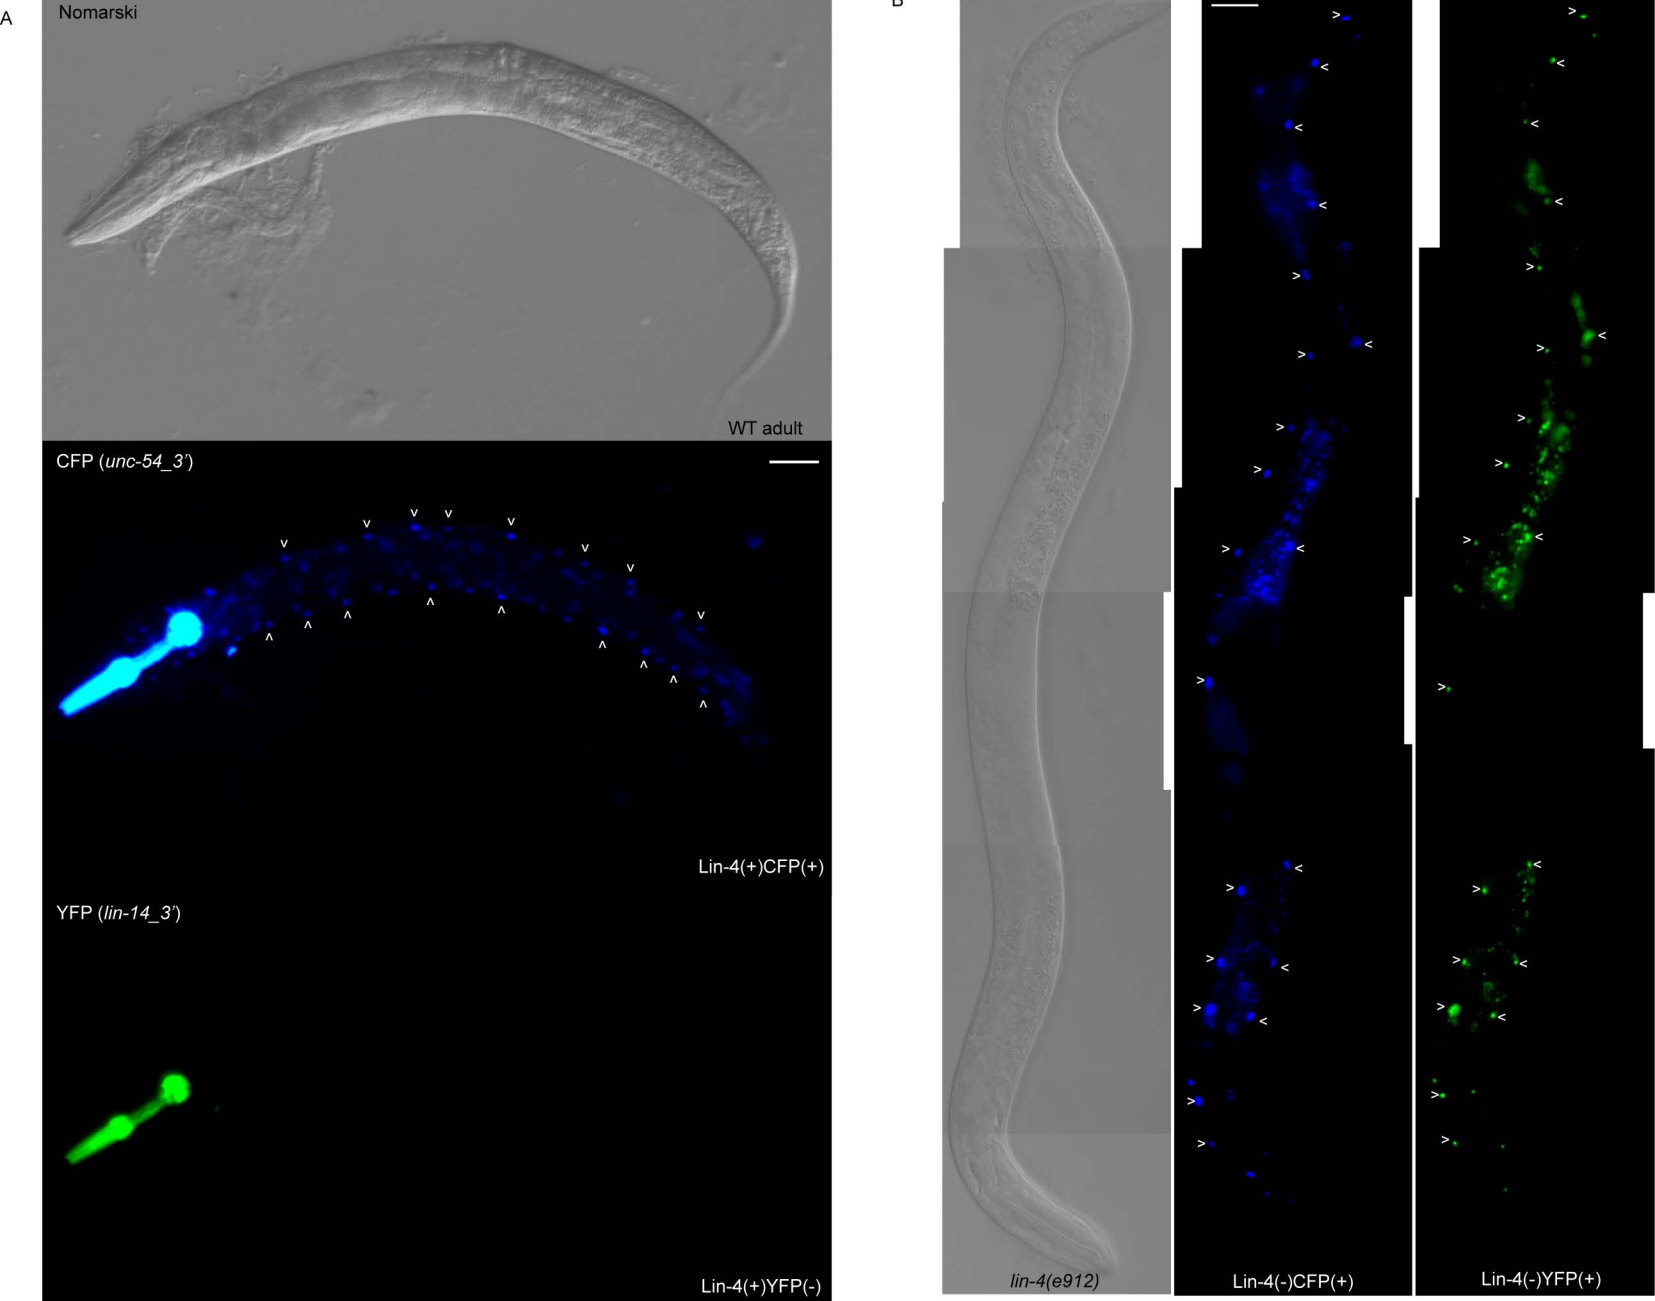

Supplement: NIHMS208475-supplement-02.pdf [file NIHMS208475-supplement-02.pdf]
